# Supplementary material
Source: Springer Nature journal article supplement (https://www.springerprofessional.de/resource/supplementary/13638_2011_386_MOESM1_ESM.pdf/11897520)

*source  
information*

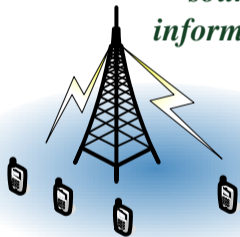

*Single cellular  
system*

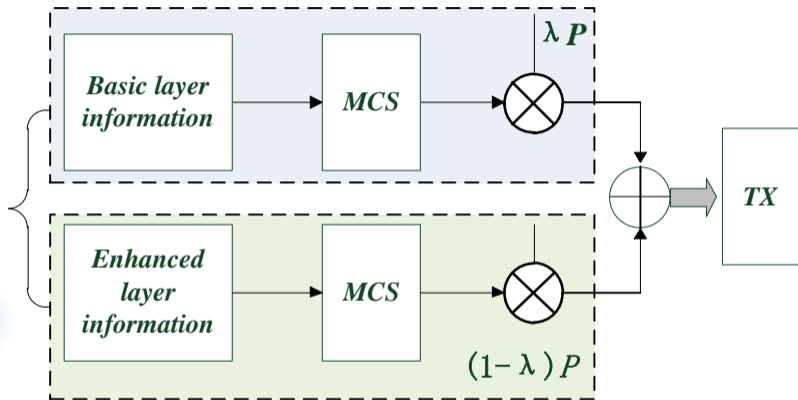

Supplement: MOESM1 [file 11897520]
